# Supplementary material
Source: ML conference proceedings conference paper supplement (https://openaccess.thecvf.com/content/CVPR2024/html/Choi_Differentiable_Display_Photometric_CVPR_2024_paper.html)
Supplement: Supplementary file 1 [file Choi_Differentiable_Display_Photometric_CVPR_2024_supplemental.zip]

Archive with 2 entries (2 files):
- 4974_supp/Differentiable Display Photometric Stereo.mp4
- 4974_supp/Differentiable Display Photometric Stereo.pdf
